# Supplementary material for: Different Components of the RNA Interference Machinery Are Required for Conidiation, Ascosporogenesis, Virulence, Deoxynivalenol Production, and Fungal Inhibition by Exogenous Double-Stranded RNA in the Head Blight Pathogen Fusarium graminearum
Source: PubMed Central journal article supplement (PMC6764512; doi:10.3389/fmicb.2019.01662), 2019-08-07
Supplement: Data_Sheet_1.pdf [file Data_Sheet_1.pdf]

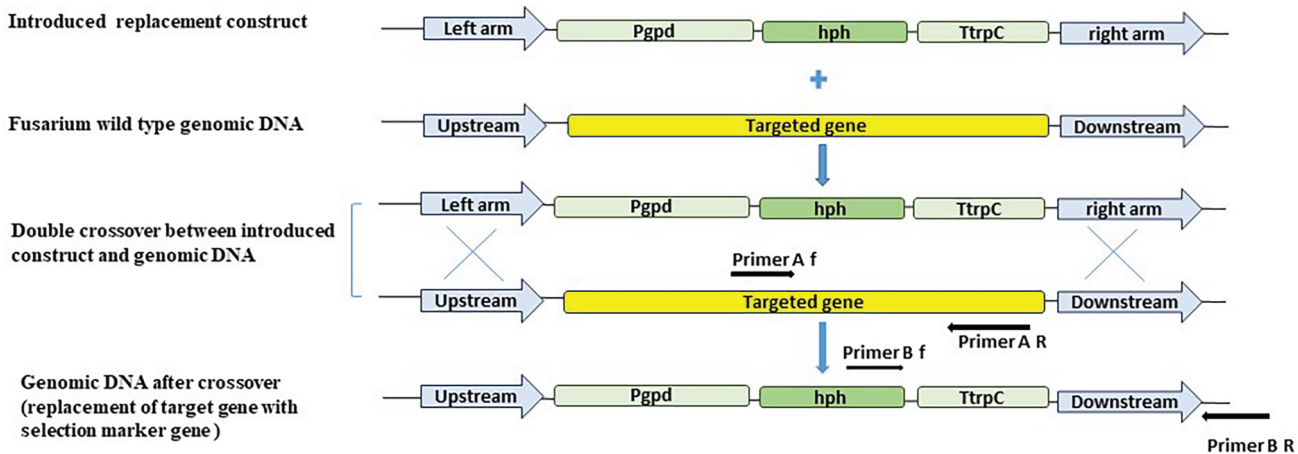

**FIGURE S1.** Schematic representation of the gene replacement strategy used for *F. graminearum* transformation. Yellow box: the target gene that has to be replaced by KO; dark green box: selection marker gene, in this case the antibiotic resistance gene (*Hygromycin B phosphotransferase* of *E. coli*, hph). Blue arrow: Homologous recombination sequences, typically ~1 kb long; Black arrows: template area for primers binding used for transformants genotyping. PgpdA: Promoter region of the *Glyceraldehyde-3-phosphate dehydrogenase* gene of *Aspergillus nidulans*; TtrpC: termination region of the *Aspergillus nidulans trpC* gene.

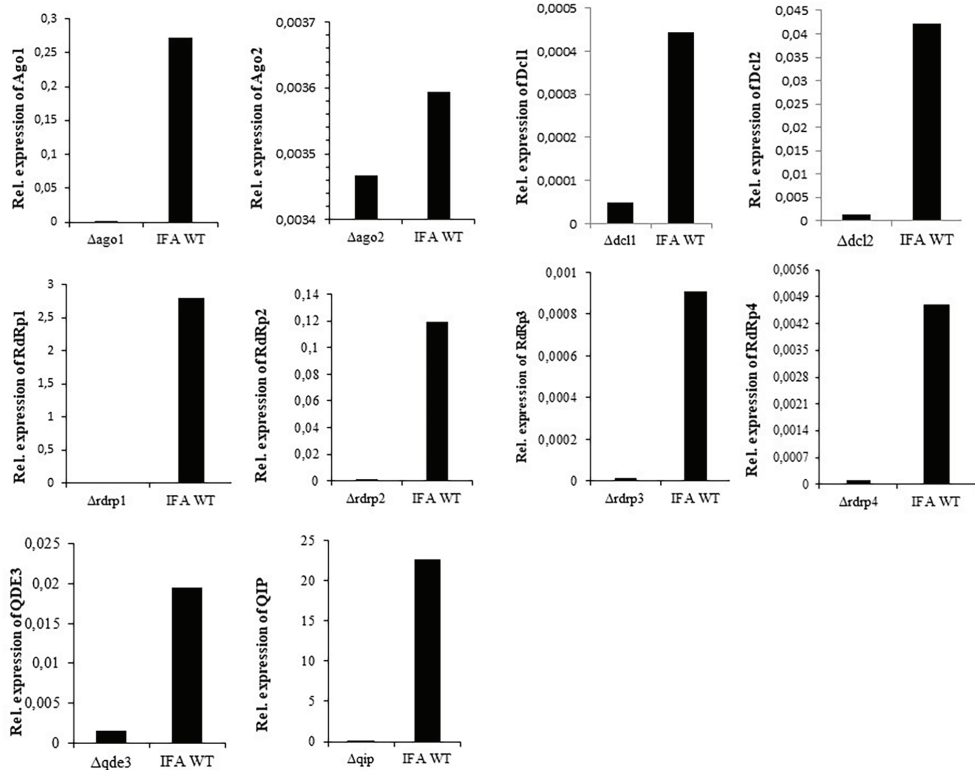

**FIGURE S2.** Compromised expression of deleted RNAi genes in *F. graminearum* knockout (KO) mutants. Expression of the targeted genes in respective *Fusarium* mutants. Transcript levels were analyzed by qRT-PCR from 5-day-old PEG liquid cultures and transcript quantified by normalization to *Fusarium*  $\beta$ -Tubulin (*FgTub*) or *Elongation factor A* (*FgEF1a*) and comparison to IFA WT.

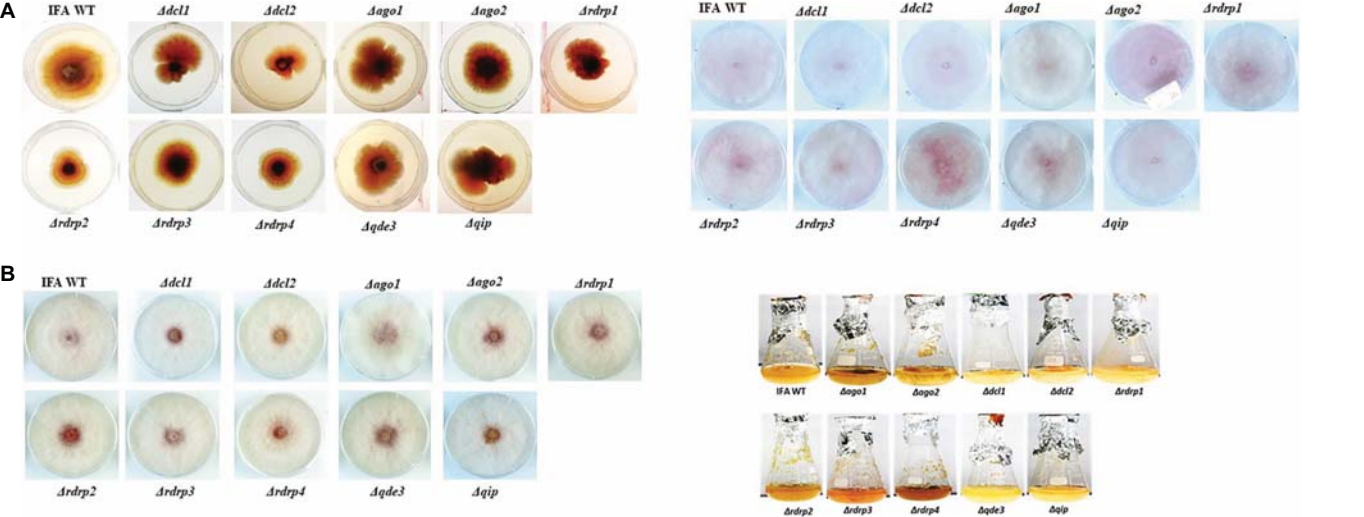

**FIGURE S3** . Colony morphology and growth of RNAi KO mutants. *Fusarium* mutants and IFA WT were grown for 5 days on solid **(A)** PDA (potato dextrose agar), **(B)** SN (synthetic nutrient), **(C)** CM (*Aspergillus* complete medium) and **(D)** in liquid PEG medium without hygromycin. The mutants showed differences in pigmentation as follows:  $\Delta ago1$ ,  $\Delta rdp2$ ,  $\Delta rdp3$  and  $\Delta rdp4$  darker pigmentation;  $\Delta dcl1$ ,  $\Delta dcl2$ , and  $\Delta rdp1$  reduced pigmentation compared to IFA WT.

**A**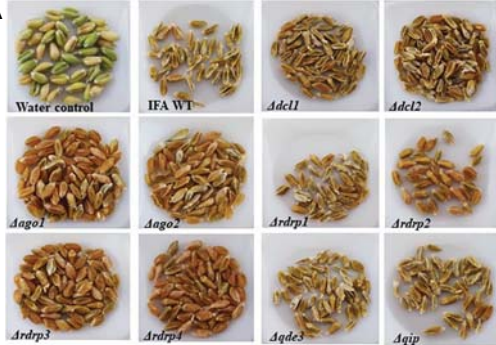**B**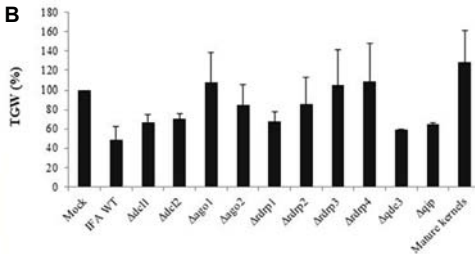

**FIGURE S4.** (A) Kernels from wheat spikes infected with *F. graminearum* RNAi mutants or IFA WT. (B) Thousand grain weight (TGW) of kernels from infected wheat spikes. Mock control: Kernels treated with 0.002% Tween 20; mature kernels: completely mature Apogee kernels.
